# Supplementary material for: Deep sequencing of uveal melanoma identifies a recurrent mutation in PLCB4
Source: PubMed Central journal article supplement (PMC4826231; doi:10.18632/oncotarget.6614), 2015-12-14
Supplement: oncotarget-07-4624-s001.pdf [file oncotarget-07-4624-s001.pdf]

## SUPPLEMENTARY MATERIAL

### SUPPLEMENTARY REFERENCE

1. Szklarczyk D, Franceschini A, Kuhn M, Simonovic M, Roth A, Minguéz P, Doerks T, Stark M, Müller J, Bork P, Jensen LJ, von Mering C. The STRING database in

2011: functional interaction networks of proteins, globally integrated and scored. *Nucleic acids research*. 2011; 39(Database issue):D561–568.

| <b>Species</b>      | <b>Protein</b> |          |          |
|---------------------|----------------|----------|----------|
| <b>Human</b>        | <b>V</b>       | <b>D</b> | <b>S</b> |
| <b>Chimp</b>        | <b>V</b>       | <b>D</b> | <b>S</b> |
| <b>Rhesus</b>       | <b>V</b>       | <b>D</b> | <b>S</b> |
| <b>Marmoset</b>     | <b>V</b>       | <b>D</b> | <b>S</b> |
| <b>Squirrel</b>     | <b>V</b>       | <b>D</b> | <b>S</b> |
| <b>Mouse</b>        | <b>V</b>       | <b>D</b> | <b>S</b> |
| <b>Rat</b>          | <b>V</b>       | <b>D</b> | <b>S</b> |
| <b>Guinea Pig</b>   | <b>V</b>       | <b>D</b> | <b>S</b> |
| <b>Rabbit</b>       | <b>V</b>       | <b>D</b> | <b>S</b> |
| <b>Pig</b>          | <b>V</b>       | <b>D</b> | <b>S</b> |
| <b>Sheep</b>        | <b>V</b>       | <b>D</b> | <b>S</b> |
| <b>Horse</b>        | <b>V</b>       | <b>D</b> | <b>S</b> |
| <b>Dog</b>          | <b>V</b>       | <b>D</b> | <b>S</b> |
| <b>Megabat</b>      | <b>V</b>       | <b>D</b> | <b>S</b> |
| <b>Elephant</b>     | <b>V</b>       | <b>D</b> | <b>S</b> |
| <b>Opossum</b>      | <b>V</b>       | <b>D</b> | <b>S</b> |
| <b>Platypus</b>     | <b>V</b>       | <b>D</b> | <b>S</b> |
| <b>Zebra Finch</b>  | <b>V</b>       | <b>D</b> | <b>S</b> |
| <b>Chicken</b>      | <b>V</b>       | <b>D</b> | <b>S</b> |
| <b>Lizard</b>       | <b>V</b>       | <b>D</b> | <b>S</b> |
| <b>X Tropicalis</b> | <b>V</b>       | <b>D</b> | <b>S</b> |
| <b>Tetraodon</b>    | <b>V</b>       | <b>D</b> | <b>S</b> |
| <b>Zebrafish</b>    | <b>V</b>       | <b>D</b> | <b>S</b> |
| <b>Lamprey</b>      | <b>V</b>       | <b>D</b> | <b>S</b> |

Supplementary Figure S1: PLCB4 p.D630Y conservation across species.

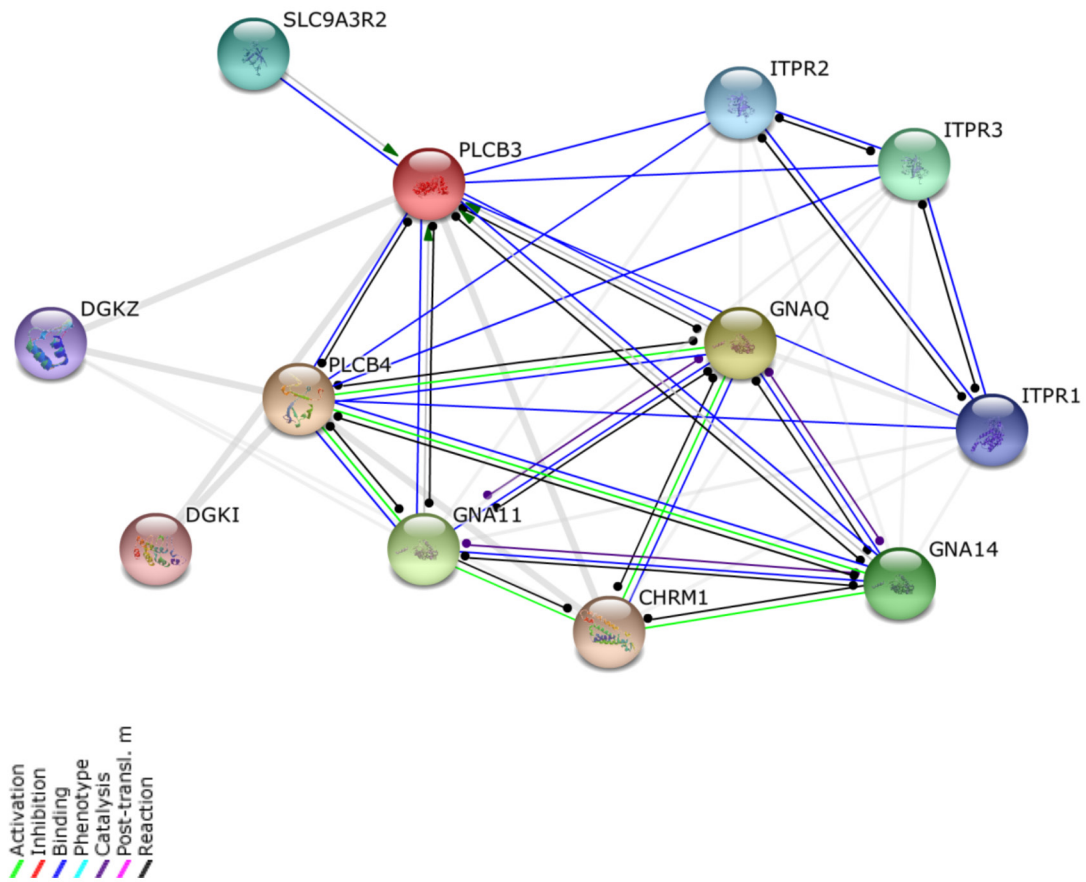

Supplementary Figure S2: PLCB4 interaction network generated by STRING [1].

Supplementary Table S1: Mutation burden per sample

| Sample ID      | Number of protein altering mutations | Exonic Mutations per Mb | Whole Genome Mutations per Mb <sup>^</sup> |
|----------------|--------------------------------------|-------------------------|--------------------------------------------|
| MM1488-T       | 0                                    | 0.089                   | na                                         |
| MM1563-T       | 0                                    | 0.059                   | na                                         |
| 554            | 0                                    | 0.059                   | 0.22                                       |
| K0111890AC-T   | 3                                    | 0.32                    | na                                         |
| 537            | 4                                    | 0.47                    | na                                         |
| C0622943-T     | 5                                    | 0.26                    | na                                         |
| MM1551-T       | 5                                    | 0.27                    | na                                         |
| 553            | 6                                    | 0.48                    | 0.49                                       |
| 141378RG-T     | 6                                    | 0.39                    | na                                         |
| 538            | 7                                    | 0.36                    | 0.35                                       |
| 534            | 8                                    | 0.53                    | 0.63                                       |
| 533            | 8                                    | 0.48                    | 0.55                                       |
| ETB-0002-T     | 8                                    | 0.27                    | na                                         |
| 535            | 9                                    | 0.53                    | 0.57                                       |
| 557            | 10                                   | 0.53                    | 0.48                                       |
| 00038-001-CL   | 11                                   | 0.50                    | na                                         |
| 531            | 11                                   | 0.48                    | 0.66                                       |
| 258            | 11                                   | 0.71                    | 0.66                                       |
| 552            | 12                                   | 0.56                    | 0.46                                       |
| 00061-001-CL   | 13                                   | 0.53                    | na                                         |
| 00085-001-CL   | 13                                   | 0.48                    | na                                         |
| 556            | 13                                   | 0.50                    | 0.57                                       |
| 539            | 13                                   | 0.48                    | 0.37                                       |
| J2217960PR-T   | 14                                   | 0.65                    | na                                         |
| 00099-001-CL   | 15                                   | 0.59                    | na                                         |
| 550            | 19                                   | 0.83                    | 0.60                                       |
| MM639-T        | 19                                   | 0.80                    | na                                         |
| 00028-001-CL   | 53                                   | 2.52                    | na                                         |
| <b>Average</b> | <b>10.6</b>                          | <b>0.52</b>             | <b>0.50</b>                                |

na is not applicable.

<sup>^</sup> Mutations per Mb apply to whole-genome samples only.

**Supplementary Table S2:**

See Supplementary Table S2

**Supplementary Table S3: Number of structural variants per sample**

| Sample ID    | Number of structural variants | Chromosome 3     |
|--------------|-------------------------------|------------------|
| 535          | 9                             |                  |
| 552          | 11                            | LOH              |
| 537          | 12                            |                  |
| 554          | 12                            |                  |
| 533          | 15                            | LOH              |
| 534          | 16                            | LOH              |
| 538          | 16                            | LOH              |
| 557          | 17                            |                  |
| 531          | 17                            |                  |
| 258          | 21                            | LOH              |
| 553          | 24                            | LOH              |
| 539          | 27                            | copy neutral LOH |
| 550          | 34                            | LOH              |
| 556          | 42                            | LOH              |
| <b>TOTAL</b> | <b>273</b>                    |                  |

LOH is loss of heterozygosity

**Supplementary Table S4:**

See Supplementary Table S4

Supplementary Table S5: Clinical details and histology of samples sequenced

| Tumor ID     | Specimen Type     | Primary tumor site | Origin    | Sex | Age at sample collection | Date of treatment | treatment          | Cell type                                               | Last Follow-up Date | Last Follow-up Status            |
|--------------|-------------------|--------------------|-----------|-----|--------------------------|-------------------|--------------------|---------------------------------------------------------|---------------------|----------------------------------|
| 00028-001-CL | primary cell line | left eye choroid   | Australia | F   | 65                       | 24/01/2012        | enucleation        | spindle type A (40%) and spindle type B (60%)           | 20/03/2015          | na                               |
| 00038-001-CL | primary cell line | left eye choroid   | Australia | M   | 73                       | 25/06/2012        | enucleation        | spindle type B, small component of epithelioid cells    | 01/07/2015          | na                               |
| 00061-001-CL | primary cell line | left eye choroid   | Australia | M   | 70                       | 7/08/2012         | enucleation        | spindle type B                                          | 13/07/2015          | na                               |
| 00085-001-CL | primary cell line | left eye choroid   | Australia | F   | 63                       | 15/10/2012        | enucleation        | spindle type B (50%) and epithelioid cells (50%)        | 01/12/2013          | liver metastasis died 01/12/2013 |
| 00099-001-CL | primary cell line | right eye choroid  | Australia | F   | 65                       | 12/11/2012        | enucleation        | spindle type A (75%) and spindle type B (25%)           | 01/06/2015          | na                               |
| C0622943-T   | primary           | choroid            | Australia | M   | 64                       | 20/12/2012        | enucleation        | mixed spindle and epithelioid                           | 23/06/2015          | na                               |
| 141378RG-T   | primary           | ciliary body       | Australia | M   | 64                       | 10/08/2012        | enucleation        | mixed spindle and epithelioid (predominantly spindle B) | 23/06/2015          | na                               |
| ETB-0002-T   | primary           | choroid            | Australia | F   | 47                       | 7/06/2011         | enucleation        | mixed spindle and epithelioid                           | 23/06/2015          | perineural spread                |
| J2217960PR-T | primary           | choroid            | Australia | F   | 80                       | 11/10/2012        | enucleation        | mixed spindle and epithelioid (predominantly spindle)   | 23/06/2015          | na                               |
| K0111890AC-T | primary           | choroid            | Australia | M   | 85                       | 20/04/2012        | plaque/enucleation | mixed spindle and epithelioid                           | 23/06/2015          | na                               |
| 553          | primary           | choroid            | Denmark   | M   | 65                       | 28/05/2014        | plaque/TVRC-biopsy | mixed spindle and epithelioid                           | 21/10/2014          | multiple liver metastasis        |
| 535          | primary           | choroid            | Denmark   | M   | 54                       | 26/02/2014        | plaque/TVRC-biopsy | mixed spindle and epithelioid                           | 26/02/2015          | 1.2 mm tumor                     |
| 556          | primary           | choroid            | Denmark   | F   | 74                       | 1/07/2014         | plaque/TVRC-biopsy | mixed spindle and epithelioid                           | 8/01/2015           | 2.2 mm tumor                     |
| 552          | primary           | choroid            | Denmark   | F   | 59                       | 28/05/2014        | enucleation        | mixed spindle and epithelioid/ and invasion in sclerae  | 27/11/2014          | progression free                 |

(continued)



| Tumor ID | Specimen Type             | Primary tumor site | Origin  | Sex | Age at sample collection | Date of treatment | treatment                  | Cell type                                                                                       | Last Follow-up Date | Last Follow-up Status           |
|----------|---------------------------|--------------------|---------|-----|--------------------------|-------------------|----------------------------|-------------------------------------------------------------------------------------------------|---------------------|---------------------------------|
| 534      | primary                   | choroid            | Denmark | F   | 54                       | 19/02/2014        | plaque/<br>TVRC-<br>biopsy | mixed spindle<br>and epithelioid                                                                | 13/03/2015          | liver<br>metastasis             |
| 533      | primary                   | choroid            | Denmark | F   | 73                       | 5/02/2014         | enucleation                | mixed spindle<br>and epithelioid/<br>and invasion<br>in sclerae and<br>extrascleral<br>invasion | 13/02/2015          | progression<br>free             |
| 557      | primary                   | choroid            | Denmark | M   | 61                       | 29/07/2014        | plaque/<br>TVRC-<br>biopsy | spindle type                                                                                    | 18/02/2015          | 1.5mm<br>tumor                  |
| 537      | primary                   | choroid            | Denmark | F   | 70                       | 5/03/2014         | plaque/<br>TVRC-<br>biopsy | spindle type                                                                                    | 12/09/2014          | progression<br>free             |
| 538      | primary                   | choroid            | Denmark | F   | 70                       | 26/03/2014        | plaque/<br>TVRC-<br>biopsy | spindle type<br>B, pre-existing<br>nevus                                                        | 18/09/2014          | 1.7mm<br>tumor                  |
| 531      | primary                   | choroid            | Denmark | F   | 63                       | 8/01/2014         | plaque/<br>TVRC-<br>biopsy | mixed spindle<br>and epithelioid                                                                | 1/12/2015           | 0.9mm<br>tumor                  |
| 258      | primary                   | choroid            | Denmark | M   | 57                       | 20/11/2013        | plaque/<br>TVRC-<br>biopsy | spindle type                                                                                    | 31/07/2014          | multiple<br>liver<br>metastasis |
| 550      | primary                   | choroid            | Denmark | F   | 62                       | 23/04/2014        | enucleation                | mixed spindle<br>and epithelioid/<br>and invasion in<br>sclerae                                 | 23/10/2014          | progression<br>free             |
| 554      | primary                   | choroid            | Denmark | F   | 39                       | 11/06/2014        | plaque/<br>TVRC-<br>biopsy | spindle type                                                                                    | 9/02/2015           | 1.2mm<br>tumor                  |
| 539      | primary                   | choroid            | Denmark | M   | 63                       | 9/04/2014         | plaque/<br>TVRC-<br>biopsy | spindle type B                                                                                  | 16/10/2014          | 2.8mm<br>tumor                  |
| MM1488   | liver<br>metastasis       | na                 | Sweden  | M   | 36                       | 2008              | na                         | na                                                                                              | 15/01/2015          | na                              |
| MM1551   | na                        | na                 | Sweden  | na  | na                       | na                | na                         | na                                                                                              | na                  | na                              |
| MM1563   | liver<br>metastasis       | na                 | Sweden  | F   | 69                       | 2008              | na                         | na                                                                                              | 15/02/2015          | na                              |
| MM639    | iliac crest<br>metastasis | choroid            | Sweden  | M   | 79                       | 15/12/1989        | na                         | mixed spindle<br>and epithelioid                                                                | 19/11/1999          | died<br>19/11/1999              |

TVRC-biopsy is transvitreal retino-choroidal biopsy

**Supplementary Table S6: Primers used for Sanger sequencing verification**

| Primer                                 | Sequence              |
|----------------------------------------|-----------------------|
| BAP1 exon 3 forward                    | atgaataaggctggctggag  |
| BAP1 exon 3 reverse                    | gctgctgctttctgtgagatt |
| BAP1 exon 4 forward                    | tcagaggcttatgctttgctc |
| BAP1 exon 4 reverse                    | tcctcctgtcttctccattt  |
| BAP1 exon 6 and 7 forward              | tccaccatagtctcactga   |
| BAP1 exon 6 and 7 reverse              | gggcaatatggtaggggtga  |
| BAP1 exon 9 forward                    | ttccagataggccctcatac  |
| BAP1 exon 9 reverse                    | gtggttagctgaagcccagat |
| BAP1 exon 11 forward                   | ggggagactgtgagctttct  |
| BAP1 exon 11 reverse                   | atcaggcagaggaacctagca |
| BAP1 exon 14 forward                   | cggttgactgcatacgtac   |
| BAP1 exon 14 reverse                   | ccaatcttcacaccaaagtcc |
| BAP1 exon 16 forward                   | cctgcctctagctgcctatt  |
| BAP1 exon 16 reverse                   | caaggtctgtcaagcctca   |
| BAP1 exon 17 forward                   | ctgaggcttgagcagacctt  |
| BAP1 exon 17 reverse                   | acctggcttcttacaacagg  |
| EIF1AX p.P2L forward                   | gaaaagcgacgcaaagagtc  |
| EIF1AX p.P2L reverse                   | caaaactgggcaacaggagtt |
| EIF1AX p.G6V, p.G8R and splice forward | tccaagaagggtagggaggt  |
| EIF1AX p.G6V, p.G8R and splice reverse | tggtggtgtgtgcctgtagt  |
| SF3B1 p. R625 and p.K666T forward      | tagagtggaaggccgagaga  |
| SF3B1 p.R625 and p.K666T reverse       | gctgagcaggaggatcactt  |
